# Supplementary material
Source: PubMed Central journal article supplement (PMC3144022)

Fig. S1

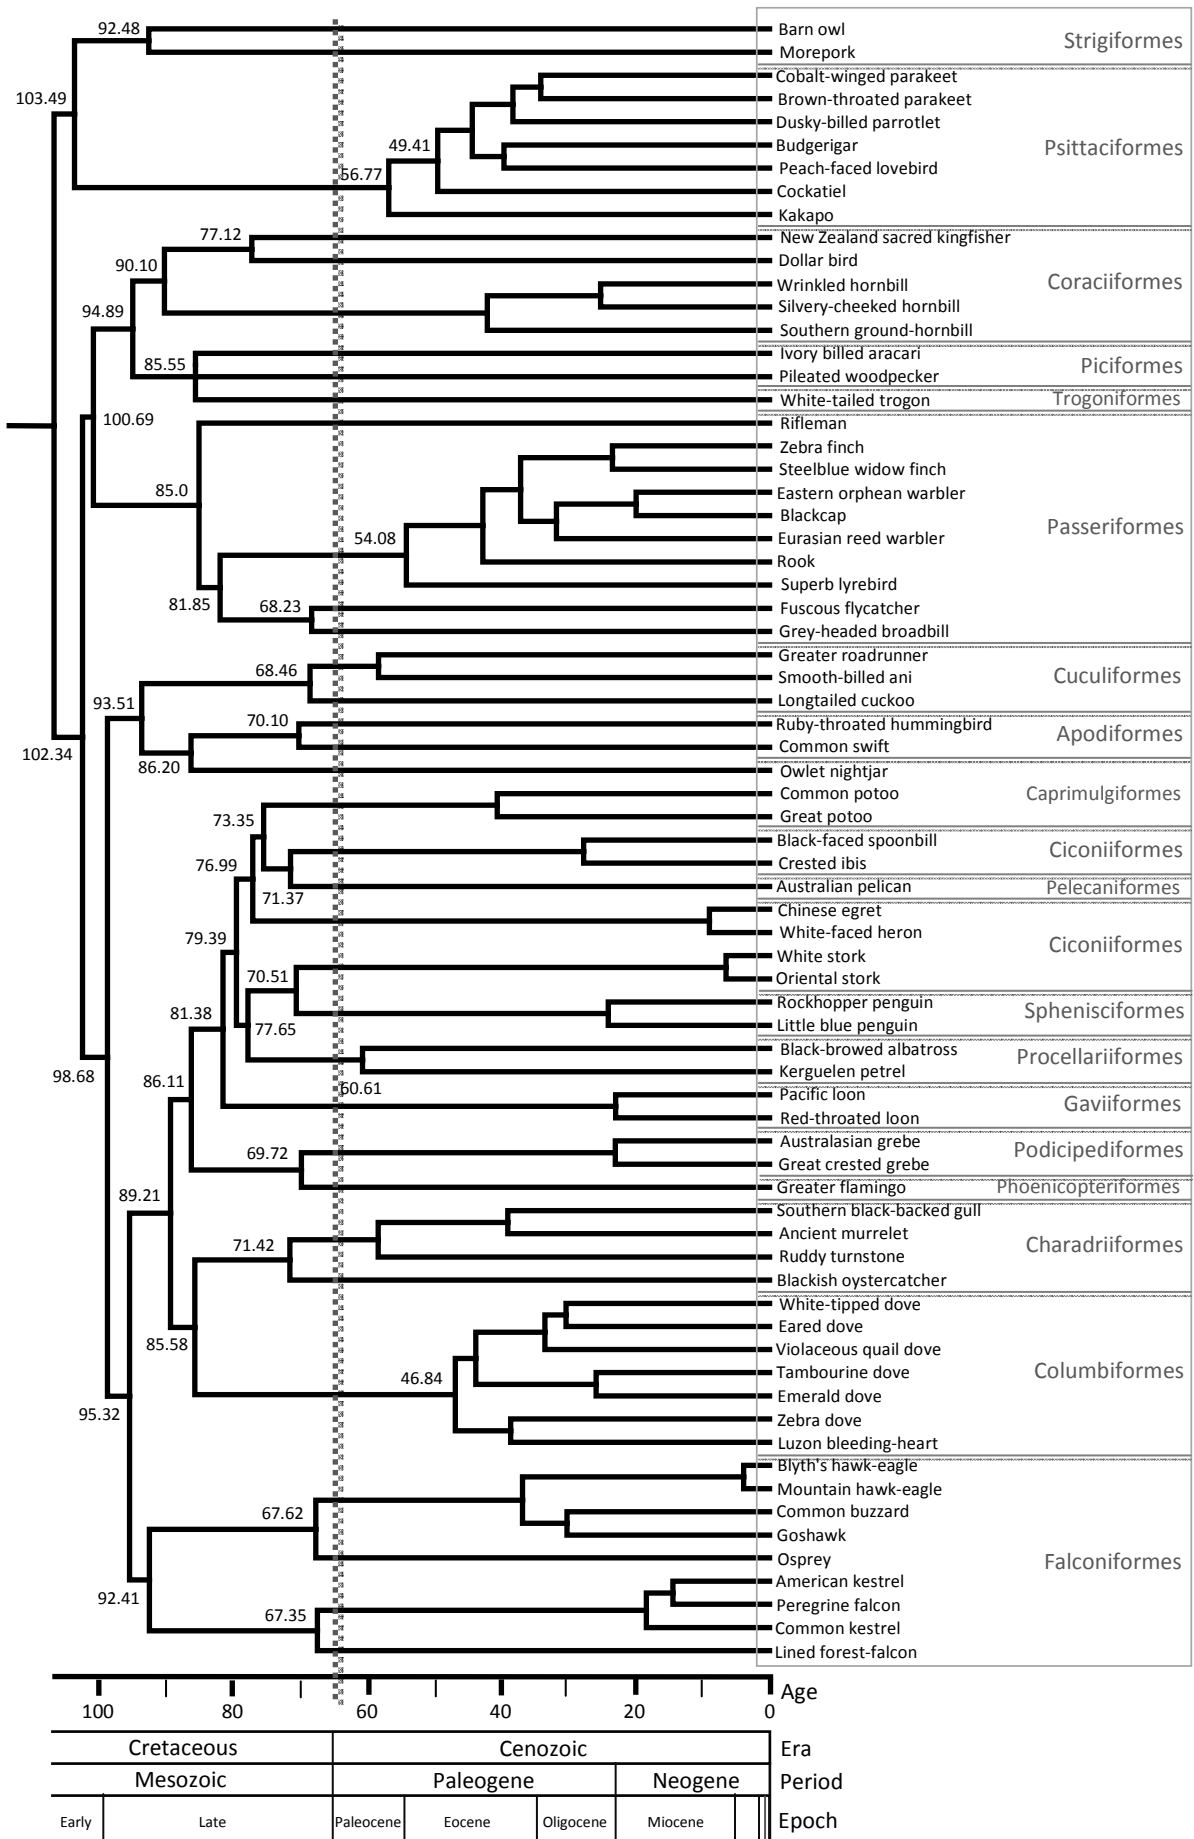

Fig. S2

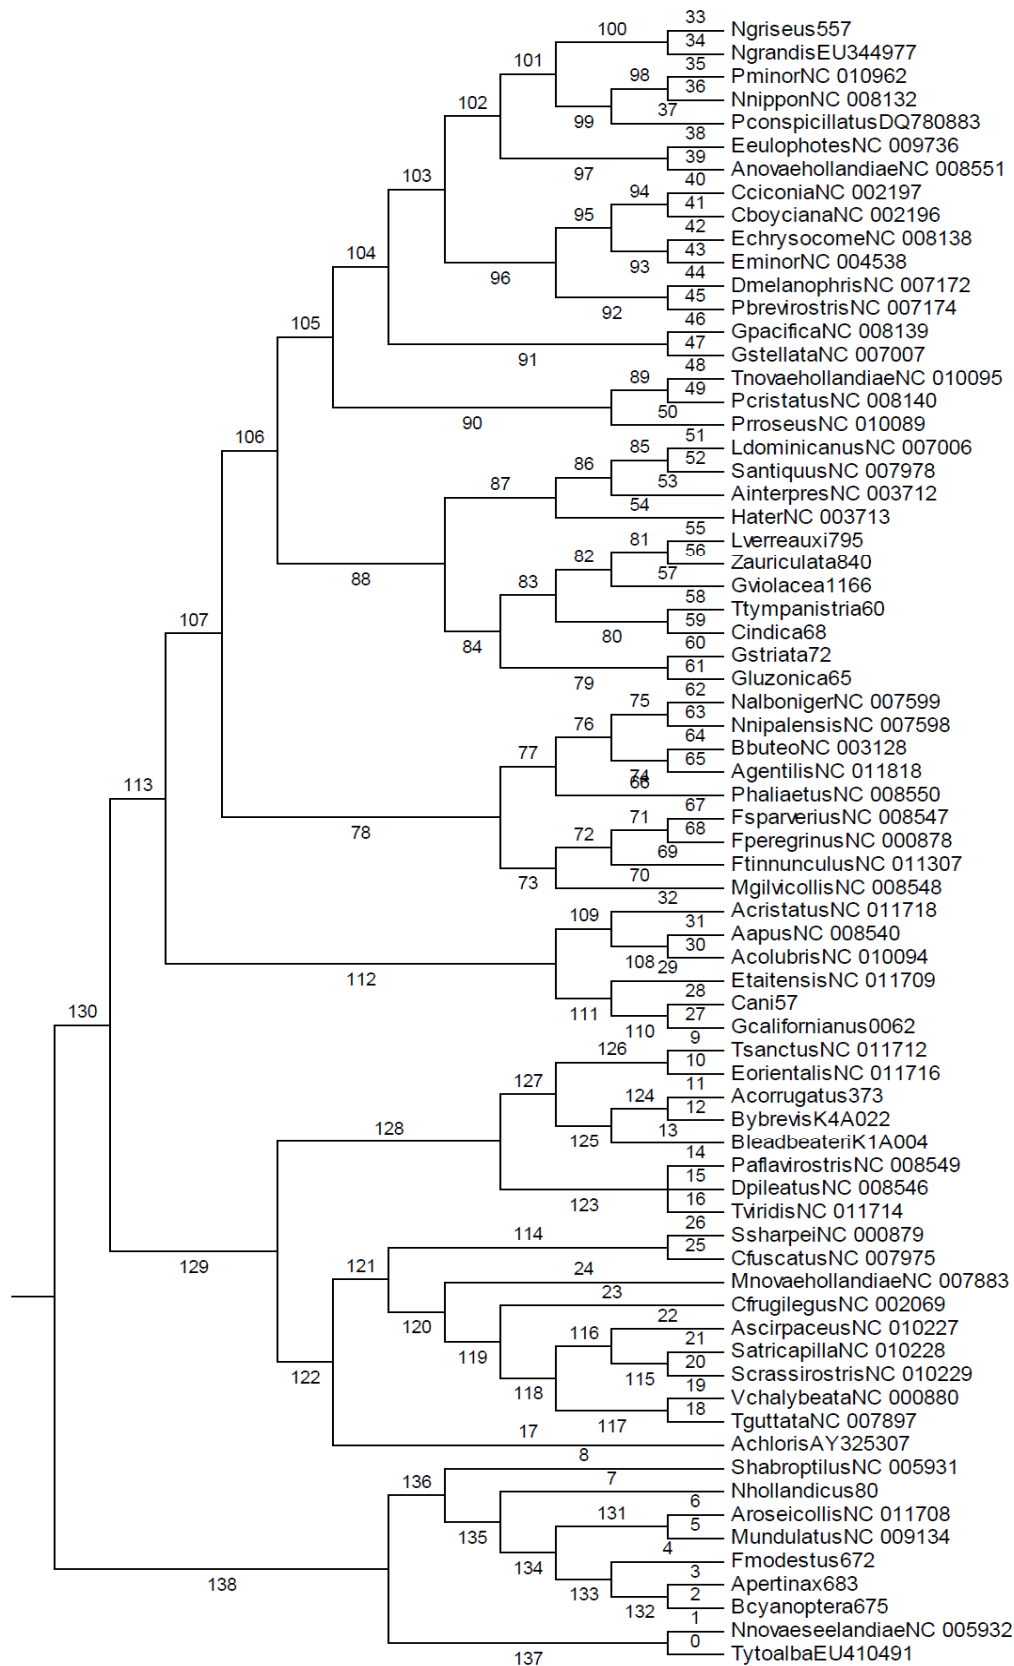

Supplement: supp_msr014_MBE-10-0542-Supplementary-Figures.pdf [file supp_msr014_MBE-10-0542-Supplementary-Figures.pdf]
